# Supplementary material for: A cyclodextrin-core star copolymer with Y-shaped ABC miktoarms and its unimolecular micelles
Source: Royal Society of Chemistry journal article supplement (doi:10.1039/c6ra28456f), 2017-01-01
Supplement: c6ra28456f1.pdf [file c6ra28456f1.pdf]

## Electronic supplementary information (ESI)

### A cyclodextrin-core star copolymer with Y-shaped ABC miktoarms and its unimolecular micelles

Yan Wang,<sup>ab</sup> Yuyang Liu,<sup>\*ab</sup> Jianghu Liang<sup>ab</sup> and Minhao Zou<sup>ab</sup>

<sup>a</sup> Key Laboratory of Macromolecular Science and Technology of Shaanxi Province, Department of Applied Chemistry, Northwestern Polytechnical University, Xi'an 710072, P.R. China

<sup>b</sup> The Key Laboratory of Space Applied Physics and Chemistry, Ministry of Education, school of science, Northwestern Polytechnical University, Xi'an 710072, P.R. China.

\*E-mail: liu\_yyang1120@nwpu.edu.cn

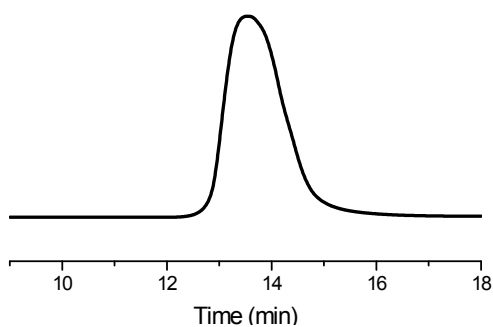

Fig. S1 DRI signal of SEC/MALLS chromatograms of *CD*-star-PEMA-Cl.

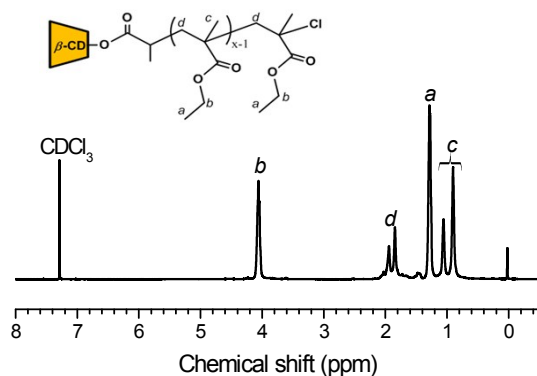

Fig. S2 <sup>1</sup>H-NMR spectrum of *CD*-star-PEMA-Cl in CDCl<sub>3</sub> (400 MHz).

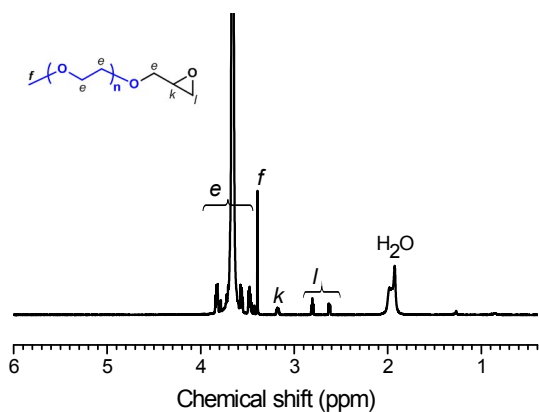

Fig. S3  $^1\text{H-NMR}$  spectrum of mPEG-epoxide in  $\text{CDCl}_3$  (400 MHz).

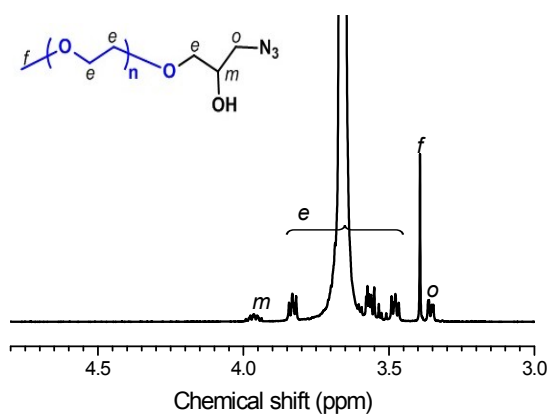

Fig. S4  $^1\text{H-NMR}$  spectrum of mPEG(-OH)- $\text{N}_3$  in  $\text{CDCl}_3$  (400 MHz).

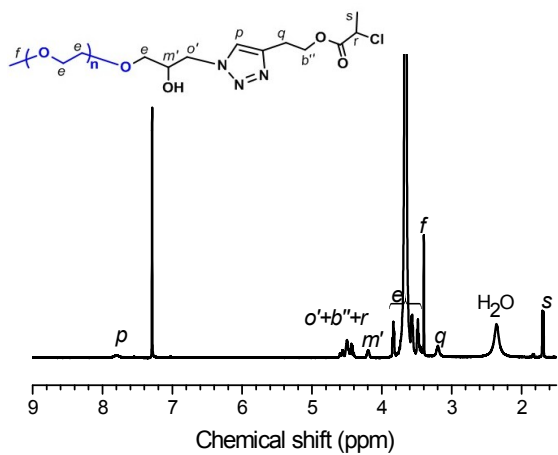

Fig. S5  $^1\text{H-NMR}$  spectrum of mPEG(-OH)-Cl in  $\text{CDCl}_3$  (400 MHz).

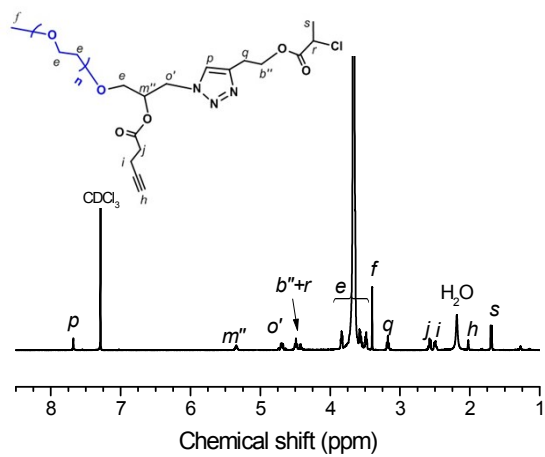

**Fig. S6**  $^1\text{H-NMR}$  spectrum of mPEG(-alkynyl)-Cl in  $\text{CDCl}_3$  (400 MHz).

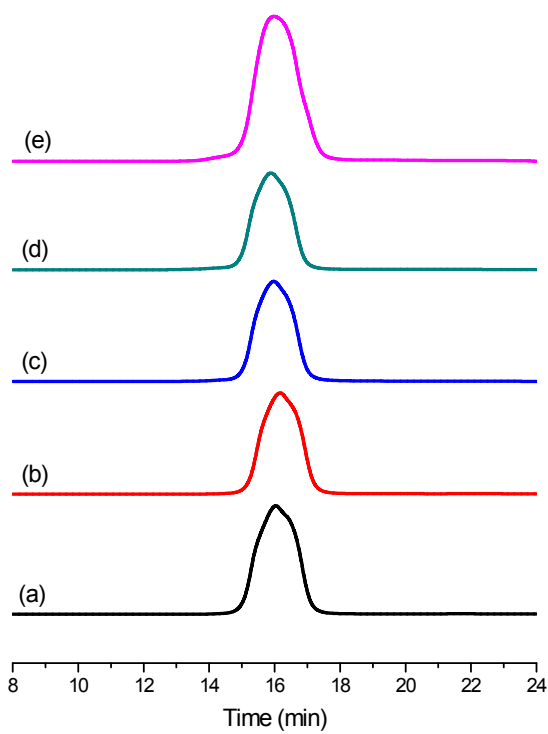

**Fig. S7** DRI signals of SEC/MALLS chromatograms for (a) mPEG, (b) mPEG-epoxide, (c) mPEG(-OH)- $\text{N}_3$ , (d) mPEG(-OH)-Cl and (e) mPEG(-alkynyl)-Cl.

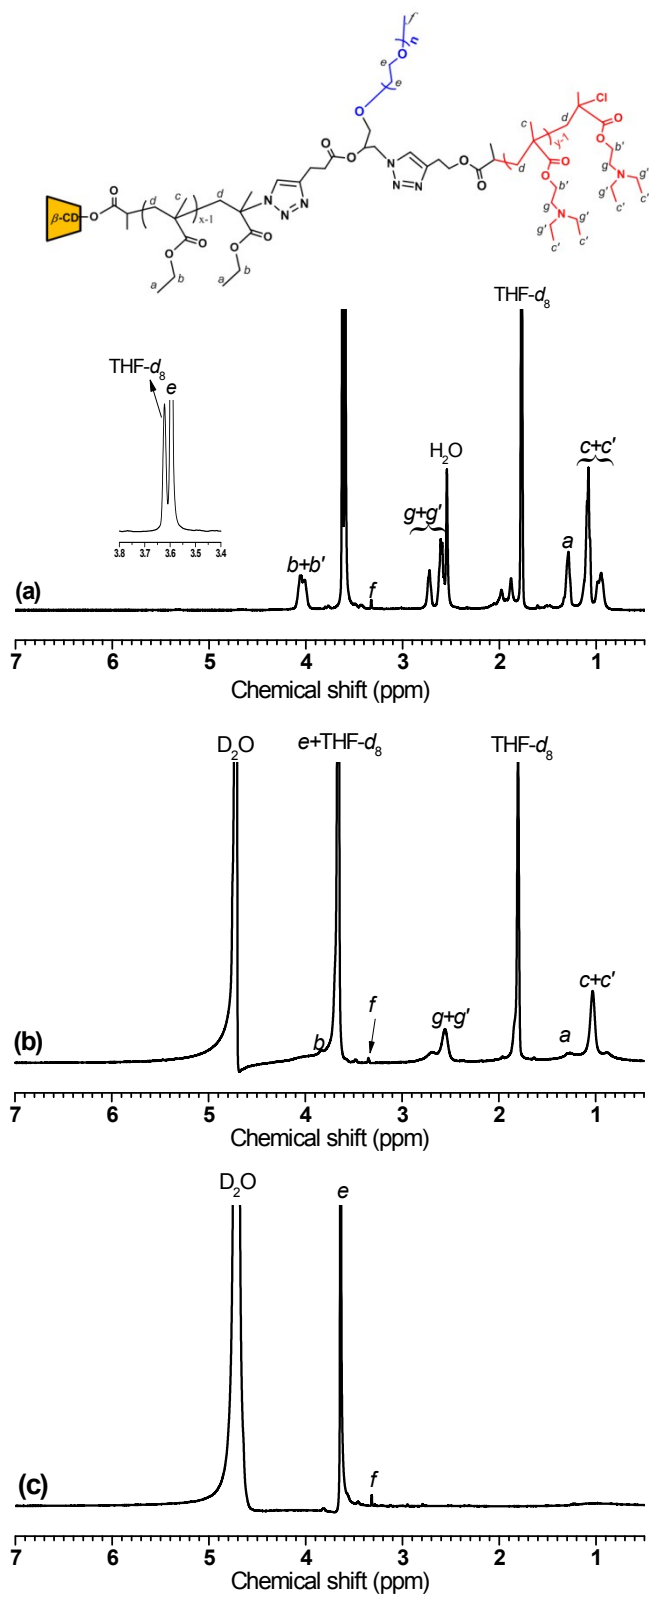

**Fig. S8**  $^1\text{H-NMR}$  spectrum of CD-star-PEMA(-b-PDEA)-b-mPEG in (a) THF- $d_8$ , (b) THF- $d_8$ /D $_2$ O mixture and (c) D $_2$ O.
